# Supplementary material for: Association between Dietary Patterns Reflecting C-Reactive Protein and Metabolic Syndrome in the Chinese Population
Source: MDPI journal article supplement (doi:10.3390/nu14132566), 2022-06-21
Supplement: s1 [file s1]

**Supplemental Table S1. Sensitivity analysis on the associations between dietary pattern and metabolic syndrome (MetS).**

|                                  | OR (95% CI) |                 |                 |                 |                 | <i>P</i> <sub>trend</sub> |
|----------------------------------|-------------|-----------------|-----------------|-----------------|-----------------|---------------------------|
|                                  | Q1          | Q2              | Q3              | Q4              | Q5              |                           |
| The main analysis                |             |                 |                 |                 |                 |                           |
| MetS                             | 1.00        | 1.10(1.02,1.19) | 1.14(1.05,1.22) | 1.23(1.15,1.33) | 1.49(1.38,1.61) | <0.001                    |
| Abdominal obesity                | 1.00        | 1.11(1.05,1.18) | 1.14(1.07,1.21) | 1.22(1.15,1.29) | 1.45(1.36,1.54) | <0.001                    |
| Hyperglycemia                    | 1.00        | 1.16(1.07,1.25) | 1.26(1.17,1.36) | 1.35(1.25,1.46) | 1.52(1.40,1.65) | <0.001                    |
| High blood pressure              | 1.00        | 1.09(1.02,1.16) | 1.11(1.04,1.19) | 1.11(1.04,1.18) | 1.19(1.11,1.28) | <0.001                    |
| Hyperlipidemia                   | 1.00        | 0.96(0.92,1.00) | 0.95(0.91,0.99) | 0.95(0.91,1.00) | 1.00(0.96,1.06) | 0.74                      |
| Additional adjust for occupation |             |                 |                 |                 |                 |                           |
| MetS                             | 1.00        | 1.11(1.02,1.20) | 1.20(1.11,1.29) | 1.25(1.16,1.34) | 1.50(1.39,1.62) | <0.001                    |
| Abdominal obesity                | 1.00        | 1.12(1.05,1.19) | 1.17(1.11,1.25) | 1.23(1.16,1.31) | 1.44(1.36,1.53) | <0.001                    |
| Hyperglycemia                    | 1.00        | 1.18(1.09,1.28) | 1.28(1.19,1.38) | 1.33(1.23,1.44) | 1.52(1.40,1.64) | <0.001                    |
| High blood pressure              | 1.00        | 1.08(1.01,1.15) | 1.12(1.05,1.20) | 1.12(1.05,1.19) | 1.19(1.11,1.27) | <0.001                    |
| Hyperlipidemia                   | 1.00        | 0.95(0.91,0.99) | 0.96(0.92,1.00) | 0.95(0.90,0.99) | 1.00(0.95,1.04) | 0.68                      |
| Excluded missing value on sport  |             |                 |                 |                 |                 |                           |
| MetS                             | 1.00        | 1.10(1.00,1.20) | 1.20(1.10,1.31) | 1.24(1.14,1.35) | 1.48(1.36,1.61) | <0.001                    |
| Abdominal obesity                | 1.00        | 1.09(1.02,1.17) | 1.16(1.09,1.24) | 1.24(1.16,1.32) | 1.45(1.36,1.56) | <0.001                    |
| Hyperglycemia                    | 1.00        | 1.18(1.08,1.29) | 1.31(1.20,1.43) | 1.32(1.21,1.44) | 1.53(1.40,1.68) | <0.001                    |
| High blood pressure              | 1.00        | 1.08(1.00,1.16) | 1.11(1.03,1.19) | 1.11(1.03,1.19) | 1.16(1.07,1.25) | <0.001                    |
| Hyperlipidemia                   | 1.00        | 0.95(0.91,1.00) | 0.97(0.92,1.02) | 0.94(0.89,0.99) | 0.99(0.94,1.05) | 0.58                      |

OR indicates odds ratio, Q indicates quintile. The results were based on model 2.

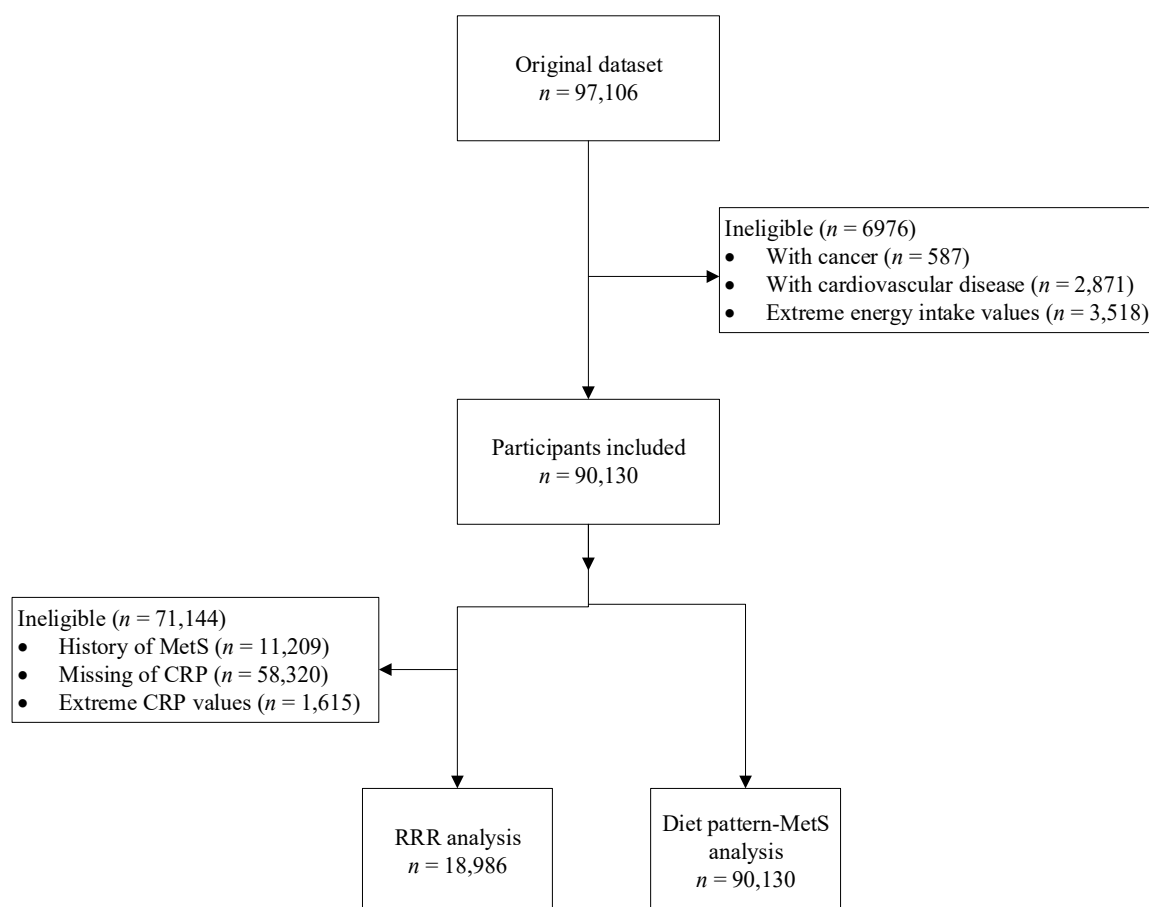

**Supplemental Figure S1. Flow Chart for study population selection.** RRR indicates reduced rank regression.

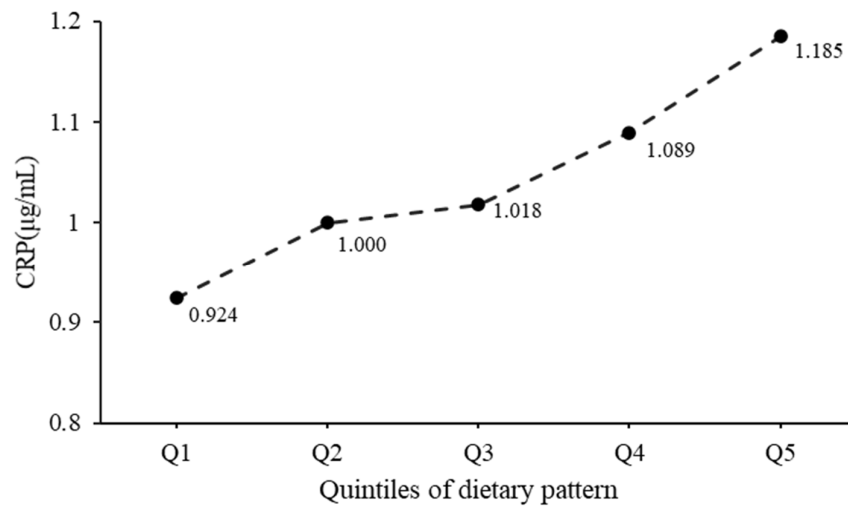

**Supplemental Figure S2. C-reactive protein (CRP) values according to dietary patterns**

**derived from reduced rank regression (RRR) in the Chinese population of MJ Health**

**Database ( $n = 18,986$ ).** Q indicates quintile. Five groups were divided by the quintile of CRP-related dietary pattern score.
